# Supplementary material
Source: publisher site journal article supplement (https://www.degruyterbrill.com/publication/isbn/9783110446432/downloadAsset/9783110446432_Errata_Stand-Mrz18.pdf)
Supplement: Supplementary file 1 [file 9783110446432_Errata_Stand-Mrz18.pdf]

S. XVII (Wichtige physikalische Größen, Band II), vorletzte Zeile, Feigenbaum-Konstante:  
8. Dezimale (Ziffer 6) ist zu streichen:  $\delta = 4,66920160910\dots$

S. 2, 2. Absatz, 5. Zeile: „Wert Null“  $\rightarrow$  „Wert  $S_0$ “, also: „bei Annäherung an  $T = 0$  kann sich die Entropie nur beliebig dem Wert  $S_0$  annähern, ihn aber nicht erreichen.“

S. 4, Gl. (II-1.6),  $V(P, T_3) \rightarrow V(P, T_3)$ :

$$V(P, T) = V(P, T_3) \cdot \frac{T}{T_3} = V(P, T_3) \cdot \left(1 + \frac{T - T_3}{T_3}\right) = \\ = V(P, T_3) \cdot [1 + \alpha_{T_3}(T - T_3)]$$

Der Satzpunkt nach Gl. (II-1.6) ist zu streichen, der Satz endet erst mit Gl. (II-1.7).

S. 5, Gl. (II-1.8): Der Satzpunkt nach „Gesetz von Gay-Lussac“ ist zu streichen, der Satz endet erst in der 2. Textzeile nach Gl. (II-1.8) mit „... am Tripelpunkt von Wasser.“

S. 8, Zeile 7: „Charles und Gay-Lussac“  $\rightarrow$  „Guillaume Amontons“

S. 8, Zeile 10: „Gl. II-1.5“  $\rightarrow$  „Gl. II-1.3“, also: „(siehe 1.1.2, Gl. II-1.3)“

S. 10, 5. Zeile nach Gl. II-1.17: „etwa 100 K“  $\rightarrow$  „sehr genau 100 K“, also: „... sehr genau 100 K auseinanderliegen.“

S. 10, Gl. II-1.18: „273,15“  $\rightarrow$  „273,15 K“,  
also:  $\vartheta(^{\circ}\text{C}) = T(\text{K}) - 273,15 \rightarrow \vartheta(^{\circ}\text{C}) = T(\text{K}) - 273,15 \text{ K}$

S. 16, Gl. (II-1.34): Im ersten Teil der Gleichung ist  $dv$  zu streichen:  $\frac{1}{N} \int_0^{\infty} dN(v) = \int_0^{\infty} 4\pi v^2 f(v) dv = 1$

S. 17, 1. Zeile: In der Formel ist  $dv$  zu streichen:  $\int_0^{\infty} dN(v) dv = N \rightarrow \int_0^{\infty} dN(v) = N$

S. 18, 1. Textzeile nach Abb. II-1.4: Das Vektorzeichen von  $\vec{v}$  ist vier mal zu streichen  
 $\vec{v} \rightarrow v$ , also: „... für die  $v$  zwischen  $v$  und  $v + dv$  liegt, ...“

S. 23, 3. Zeile nach Gl. (II-1.49): Bei  $P_r$  fehlt das Summenzeichen:  $\sum_r P_r = 1$

S. 27, Fußnote 43, letzte Zeile: Beim Wort „Polarwinkeln“ ist „Polar“ zu streichen, also: „... von den Winkeln  $\vartheta$  und  $\varphi$  abhängt).

S. 29, Abb. II-1.7: Kurvenbeschriftung:  $\frac{\bar{v}}{v_w}$  ( $v$  in  $v/v_w$  soll einen Querbalken aufweisen, keinen Vektorpfeil). In der Bildunterschrift (2. Zeile) ist  $f(v)$  durch  $n(v)/n$  zu ersetzen, also: „Die Verteilungsfunktion  $n(v)/n$  ist gegen die ...“

S. 30, 11. Zeile: Volumen  $\rightarrow$  Volumenelement, also: „... aber das entsprechende Volumenelement des Geschwindigkeitsraums (Kugelschale  $4\pi v^2 dv$ ) ...“

S. 32, Abb. II-1.8, Bildunterschrift, 1. Zeile, Textänderung und  $v \rightarrow n(v)$ : „Maxwellsche Verteilung  $n(v)$  des Betrags der Molekülgeschwindigkeit ...“

S. 40, Beispiel, letzte Formelzeile, Einheit am Ende des ersten Teils: „(ms<sup>-1</sup>)<sup>2</sup>“ statt „(ms<sup>-1</sup>)“:

$$\overline{v^2} = \frac{3kT}{m} = 2,5 \cdot 10^{-5} \text{ (ms}^{-1}\text{)}^2$$

S. 42, 3. Textzeile nach Abb. II-1.12: durchtritt → hindurchtreten, also: „(Zahl der Teilchen, die pro Zeiteinheit durch die Flächeneinheit hindurchtreten)“

S. 47, 1. Absatz, Zeile 4: „[W m<sup>-2</sup> s<sup>-1</sup>] → „[W m<sup>-2</sup>]“ (s<sup>-1</sup> ist zu streichen)

S. 47, 4. Zeile nach Gl. (II-1.105):  $\Lambda < 0 \rightarrow \Lambda > 0$

S. 53, 8. Zeile:  $W \rightarrow dW$ , also: „... verrichtete differentielle Arbeit  $dW$  ...“

S. 56, Fußnote 75, 2. Zeile:  $U = (S, V) \rightarrow U = U(S, V)$

S. 57, Beispiel, 8. Zeile: „eines Systems“ → „eines Teilchens („... ist die mittlere Energie eines Teilchens  $\frac{1}{2} kT$  pro Freiheitsgrad.“)

S. 62, Fußnote 80, letzte Zeile, nach dem Doppelpfeil:  $\frac{C_P^m}{C_V^m} = \frac{Z+2}{2} \rightarrow \frac{C_P^m}{C_V^m} = \frac{Z+2}{Z}$

S. 63, 8. Zeile und folgende bis zur Überschrift **Zur Skizze des Arbeitsdiagramms des adiabatischen Prozesses (Abb. II-1.20)**, Textänderung auf:  
 „Bei gleicher Volumenänderung ist daher die isotherme Volumsarbeit bei Kompression kleiner, bei Expansion größer als die adiabatische:

$$W_{isoth}^{\text{exp}} = \text{Fläche } (V_0, 0, 1', V_1, V_0) < 0 \text{ für isotherme Expansion}$$

$$W_{adiab}^{\text{exp}} = \text{Fläche } (V_0, 0, 1, V_1, V_0) < 0 \text{ für adiabatische Expansion}$$

S. 64; Abb II-1.20, geänderte Abbildung:

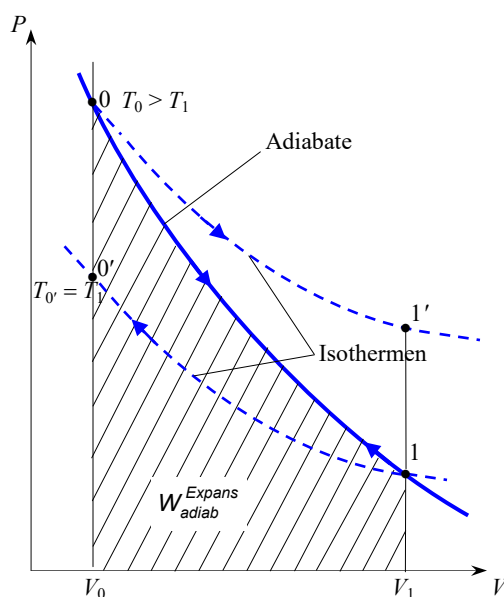

Abb. II-1.20: Arbeitsdiagramm des adiabatischen und des isothermen Prozesses.

S. 69, 4. Zeile nach Gl. (II-1.167) (letzte Zeile vor dem Beispiel):  $\sum_i \frac{Q}{T} = 0 \rightarrow \sum_i \frac{Q_i}{T_i} = 0$

S. 70, Beispiel, 9. Zeile (5. Zeile nach der 3. Gleichung):  $-Q_1 \rightarrow Q_1$ , also: „... als  $Q_1 = Q_2 + W$  abgegeben.“

S. 71, Gl. (II-1.168):  $W_1 \rightarrow W_3$ , also:  $T_{\text{thermodyn}} = T_2 = T_3 \left[ 1 - \left( \frac{W}{W_3} \right)_{\text{rev}} \right]$

S. 75, Gl. (II-1.185): alle  $\Delta$  streichen und kleiner Zusatz:

$$\eta = \frac{W}{Q_1} = \frac{Q_1 - Q_2}{Q_1} < \left( \frac{Q_1 - Q_2}{Q_1} \right)_{\text{rev}} = \frac{T_1 - T_2}{T_1} \Rightarrow \frac{Q_1}{T_1} + \frac{Q_2}{T_2} < 0$$

S. 84, Fußnote 98, 2. Zeile, Klammeränderung:

$$dU = dQ - PdV < TdS_{\text{irr}} - PdV = d(TS_{\text{irr}} - S_{\text{irr}}dT) - PdV$$

$$\rightarrow dU = dQ - PdV < TdS_{\text{irr}} - PdV = d(TS_{\text{irr}}) - S_{\text{irr}}dT - PdV$$

S. 87, Fußnote 100, Änderung von Text und Gleichungsnummer: „Vgl. mit der Grundgleichung für irreversible Prozesse (Gl. II-1.240): für  $dU = dV = 0$  folgt  $TdS > 0$ .“

S. 88, Fußnote 101, Änderung von Text und Gleichungsnummer: „Aus der Grundgleichung für irreversible Prozesse (Gl. II-1.240) folgt für  $dH = dP = 0 \Rightarrow TdS > 0$ .“

S. 100, Zusammenfassung Punkt 4, blaues Feld, Querstrich über  $E_{\text{kin}}$  (Mittelwert):

$$P.V = \frac{1}{3} N \cdot m \cdot \overline{v^2} = \frac{2}{3} N \cdot \frac{m}{2} \cdot \overline{v^2} = \frac{2}{3} N \cdot \overline{E_{\text{kin}}} = NkT$$

S. 113, letzte Zeile: „170 °C“  $\rightarrow$  „-194 °C (78,7 K)“. Text: „In mehreren Abkühlstufen wird die Luft unter den Siedepunkt von etwa -194 °C (78,7 K) abgekühlt und verflüssigt.“

S. 125, 3. Zeile (letzte Zeile vor Gl. II-2.26):  $\omega_0^2 = \frac{g}{m} \rightarrow \omega_0^2 = \frac{g}{l_0}$

S. 135, Beispiel 3 (nichtlineares mathematisches Pendel), 1. Gleichung nach der Skizze,  $m \rightarrow m_s$ :

$$F_t = -m_s g \sin \varphi$$

S. 137, Gl. (II-2.39), letzter Faktor: „ $\delta_n$ “ ( $\delta$  mit Index  $n$ ), also  $\delta_{n+1} = \frac{df(x)}{dx} \Big|_{x=x_f} \cdot \delta_n$

S. 144, 1. Zeile nach Gl. II-2.53,  $x_n$  statt  $x$ :  $0 \leq x < 1 \rightarrow 0 \leq x_n < 1$

S. 146, Abb. II-2.12: Der vorletzte Term der Gleichung in der Abbildung ist abzuändern: nicht  $\frac{3}{2,4}$

sondern  $\frac{3}{2 \cdot 4}$  (Malpunkt zwischen 2 und 4), d.h.  $y_{\text{max}} = \sigma \left( \frac{1}{2} - \frac{1}{2^2} \right) = \frac{\sigma}{4} = \frac{3}{2 \cdot 4} = 0,375$

S. 157, Gl. II-2.71: 8. Dezimale der Feigenbaum-Konstante (Ziffer 6) ist zu streichen:

$$\delta = \lim_{k \rightarrow \infty} \frac{\Delta_k}{\Delta_{k+1}} = 4,66920160910...$$

S. 158, Gl. II-2.75,  $f^{2k} \rightarrow f^{2^k} : f^{2^k}(x_k) \equiv \underbrace{f(f \dots f(x_k))}_{\substack{\text{f erscheint} \\ 2^k \text{ mal}}}$  ist ein Fixpunkt mit  $[f^{2^k}(x_k)]' < 1$

S. 162, Beispiel, Zeichnung: Beschriftung des Pfeils ganz rechts: statt  $0,5 \rightarrow 0,2385$  soll  $0,5 \rightarrow 0,2236$  stehen

S. 169, Text zwischen Gl. (II-2.108) und (II-2.109):  $N(\lambda l_n) = \lambda^\kappa \cdot N(l_n)$   
(Beistrich zwischen  $\lambda$  und  $l_n$  in der Klammer ist zu streichen).

S. 176, vorletzte Zeile: statt „man nenn“  $\rightarrow$  „man nennt“.

S. 178, 6. Zeile nach dem blauen Feld (2. Zeile vor Gl. II-2.123): „verringert“ statt „erhöht“ („und damit verringert sich der Abstand zur nächsten Bifurkation ...“)

S. 182, Fußnote 50, 2. Zeile, ca. 6000 K statt ca. 2000 K („innerer Erdkern: fest, ca. 6000 K, äußerer Erdkern: flüssig, ca. 3000 K“)

S. 189, Fußnote 60, 1. Zeile, in der Klammer „Verdampfer“ statt „Kompressor“: „... (im Verdampfer und Kondensator) ...“

S. 196, Gl. II-2.142: im ersten Term nach dem Gleichheitszeichen fehlt bei  $\rho$  der Index 0 ( $\rho \rightarrow \rho_0$ ):

$$\underbrace{\frac{\partial \vec{v}}{\partial t} + (\vec{v} \cdot \vec{\nabla}) \vec{v}}_{\frac{d\vec{v}}{dt}} = - \underbrace{\frac{\vec{\nabla} P}{\rho_0}}_{\text{Druckkraft} / \rho_0} - \underbrace{[1 - \gamma(T - T_0)] g \vec{e}_z}_{\text{Schwerkraft} / \rho_0} + \underbrace{\nu \nabla^2 \vec{v} / \rho_0}_{\text{Reibungskraft} / \rho_0}$$

S. 201, Gl. II-3.4: Das erste Gleichheitszeichen (=) der linken Gleichung und jenes der rechten sind durch „ungefähr gleich“ ( $\cong$ ) zu ersetzen.  $\frac{v}{c} \cong \frac{3 \cdot 10^4}{3 \cdot 10^8} = 10^{-4}$  und  $\frac{v^2}{c^2} \cong 10^{-8}$

S. 208, Abb II-3.6, linker Teil der Abbildung: (Achse)  $z'$  sollte nur  $z$  heißen. Der Strich von  $z$  ist zu streichen.

S. 208, Gl. II-3.12, 2. Zeile,  $t \rightarrow t' : x'(O) = -v \cdot t'$

S. 214, Fußnote 19, 2. Zeile, Klammer unter dem letzten Term der Gleichung,  $> 0 \rightarrow \geq 0$ :

$$t'_2 - t'_1 = \frac{t_2 - t_1 - \frac{v}{c}(t_2 - t_1)}{\sqrt{1 - \beta^2}} = (t_2 - t_1) \cdot \underbrace{\frac{1 - \frac{v}{c}}{\sqrt{1 - \beta^2}}}_{\geq 0}$$

S. 215, Gl. II-3.37: Zweimal Vorzeichenänderung:  $-v \cdot x'/c^2 \rightarrow +v \cdot x'/c^2$   
 $\underline{\Delta t} = t_2 - t_1 = \gamma(t'_2 + v \cdot x'/c^2 - (t'_1 + v \cdot x'/c^2)) = \underline{\gamma \cdot \Delta \tau}$

S. 216, Gl. II-3.39, Vorzeichenänderung im 2. Term nach dem 2. Gleichheitszeichen,  
 $-(t_1 + v \cdot x/c^2) \rightarrow -(t_1 - v \cdot x/c^2) : \underline{\Delta t'} = t'_2 - t'_1 = \gamma(t_2 - v \cdot x/c^2 - (t_1 - v \cdot x/c^2)) = \underline{\gamma \cdot \Delta \tau}$

S. 218, letzter Absatz, 1. Zeile (3. Zeile vom Seitenende), Textänderung, „in  $\Sigma$  bewegten“  $\rightarrow$  „mit  $\Sigma$  mitbewegten“: „Ebenso erscheint dem in  $\Sigma'$  ruhenden Beobachter die Länge eines mit  $\Sigma$  mitbewegten Körpers in der Bewegungsrichtung verkürzt.“

S. 218, Fußnote 23 (beginnt auf S. 217), 2. Zeile,  $x_2 - x_2 \rightarrow x_2 - x_1$ : „Der räumliche Abstand  $x_2 - x_1$  der beiden Beobachter  $B_2$  und  $B_1$  ...“

S. 219, Unterabschnitt ‚Ist das Verhalten in  $x$  und  $t$  unsymmetrisch?‘, 1. Absatz, vorletzte Zeile (4. Zeile vom Seitenende), „... im System  $\Sigma'$  bewegen...“  $\rightarrow$  „... mit dem System  $\Sigma'$  mitbewegten...“; „Die gleichartige Zeitmessung im System  $\Sigma$  von mit dem System  $\Sigma'$  mitbewegten Uhren ist physikalisch bedeutungslos.“

S. 226, Beispiel, 6. Zeile, rechte Formel, im Nenner  $360 \rightarrow 180$ :

$$c = \frac{v}{\alpha} = \frac{3 \cdot 10^4 \text{ ms}^{-1}}{20,5'' \cdot \frac{\pi}{180 \cdot 3600} \cdot \frac{\text{rad}}{1''}} = 3,02 \cdot 10^8 \text{ m/s}$$

S. 228, Zeile vor Gl. II-3.69 und Zeile vor Gl. II-3.70, jeweils in der Klammer „ $A$ “ und „ $B$ “ vertauschen: „... (Hinreise,  $B$  entfernt sich von  $A$ ):“ und „... (Rückreise,  $B$  nähert sich  $A$ ):“

S. 229, Abb. II-310, Bildunterschrift, 3. Zeile (Formel), Einfügung der Dimension „a“ (Jahr) nach der

Zahl 5:  $x_Q = v \cdot \frac{T}{2} = c\beta \frac{T}{2} = c \cdot 0,8 \cdot 5a = 4L_J = 4 \cdot 9,46 \cdot 10^{15} \text{ m} = 3,78 \cdot 10^{16} \text{ m}$

S.238, Fußnote 37, 1. Zeile, Formel, vor  $d\tau^2$  den Faktor  $c^2$  einfügen:  $c^2 dt^2 = c^2 d\tau^2 + d\vec{r}^2 > c^2 d\tau^2$

S. 240, Abb. II-3.17, Bildbeschriftung,  $\beta \rightarrow \alpha$

Bildunterschrift, 2. Zeile, Textänderung: „... des Systems  $\Sigma$  den Winkel  $\beta = \frac{v}{c}$ .“  $\rightarrow$  „... des Systems  $\Sigma$

den Winkel  $\alpha$  mit  $\tan \alpha = \beta = \frac{v}{c}$ .“

Verbesserte Abbildung mit verbesserter Bildunterschrift:

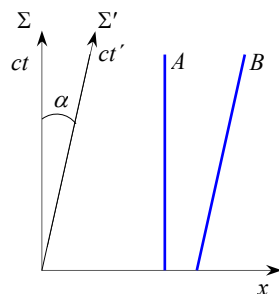

Abb. II-3.17: Die Koordinatenachse  $ct'$  des Systems  $\Sigma'$  bildet mit der Koordinatenachse  $ct$  des

Systems  $\Sigma$  den Winkel  $\alpha$  mit  $\tan \alpha = \beta = \frac{v}{c}$ . In diesem Beispiel ruht  $A$  in  $\Sigma$  und bewegt sich mit

$-v$  in  $\Sigma'$ , während  $B$  in  $\Sigma'$  ruht und sich in  $\Sigma$  mit der Geschwindigkeit  $+v$  bewegt.

S. 248, Gl. II-3.114:  $\vec{u}' = u'_x \vec{e}_x + u'_y \vec{e}_y + u'_z \vec{e}_z \rightarrow \vec{u}' = u'_x \vec{e}_x + u'_y \vec{e}_y + u'_z \vec{e}_z$

S. 267, letzte Zeile vor ‚Anmerkung‘, „träge“ streichen und Zusatz im Text: „... die Masse  $m$  im relativistischen Energiesatz ist die ganz ‚normale‘ Masse, eine Lorentz-invariante Körpereigenschaft, die durch Wägung in ihrem Ruhesystem bestimmt werden kann.“

S. 273, letzte Zeile vor Gl. II-3.177; „Differenz“  $\rightarrow$  „Differenzquadrat“: „... ergibt sich als Differenzquadrat“

S. 276, Fußnote 55, 2. Zeile: „... mit der konstanten Masse.“  $\rightarrow$  „... mit dem Quadrat der konstanten Masse.“

S. 276, Fußnote 57, 1. Gleichung, rechts vom Gleichheitszeichen den Faktor  $\left| \frac{dv}{dt} \right|$  einfügen:

$$\frac{d}{dt}(v^2) = 2v \left| \frac{dv}{dt} \right|$$

2. Gleichung, Zusatz:  $\frac{d}{dt}(\vec{v} \cdot \vec{v}) = \frac{d\vec{v}}{dt} \cdot \vec{v} + \vec{v} \cdot \frac{d\vec{v}}{dt} = 2\vec{v} \cdot \frac{d\vec{v}}{dt}$  ( $d\vec{v}$  muss nicht parallel zu  $\vec{v}$  sein!).

$$\text{S. 278, Gl. II-3.197, } \dot{\hat{p}} \rightarrow \frac{d\hat{p}}{d\tau} : \hat{\vec{F}} = \frac{d\hat{p}}{d\tau} = \{F_0, \vec{F}_R\} = m\gamma\{c\dot{\gamma}, \dot{\gamma}\vec{v} + \gamma\vec{a}\} = m\hat{\vec{a}}$$

S. 279, 3. Zeile:  $\vec{p}_R = m\vec{v}_R \rightarrow m\vec{v} \rightarrow \vec{p}_R = m\vec{v}$  (Index  $R$  von  $\vec{v}$  und nachfolgende Teile streichen)

S. 283, Beispiel 3, 3. Zeile von unten (letzte Formel), eckige Klammer im Nenner nach dem ersten

$$\text{Gleichheitszeichen ist zu streichen: } v_x^2 = \frac{c^2}{1/\left(\frac{F_x t}{mc}\right)^2 + 1} \approx \left[1 - \left(\frac{mc}{F_x t}\right)^2\right] c^2$$

S. 286, Beispiel 4, 4. Zeile nach der Bildunterschrift zur Abbildung, Formeländerung:

$$\gamma(t) = \frac{E(t)}{E_0} = \frac{\sqrt{p_0^2 c^2 + E_0^2 + (F_y t \cdot c)^2}}{E_0} = \sqrt{1 + \left(\frac{p_0 c}{E_0}\right)^2 + \left(\frac{F_y t \cdot c}{E_0}\right)^2} > 1$$

$$\text{S. 287, Beispiel 4, 2. Zeile, } \ll 0 \rightarrow \ll 1: \frac{F_y \ell}{p_0 c} = \frac{F_y \cdot \frac{\ell}{c}}{p_0} = \frac{\Delta p^*}{p_0} \ll 1$$

$$\text{S. 290, Zusammenfassung, Punkt 7, 7. Zeile, } \dot{\hat{p}} \rightarrow \frac{d\hat{p}}{d\tau} : \hat{\vec{F}} = \frac{d\hat{p}}{d\tau} = \{F_0, \vec{F}_R\} = m\gamma\{c\dot{\gamma}, \dot{\gamma}\vec{v} + \gamma\vec{a}\} = m\hat{\vec{a}}$$
